# Supplementary material for: Neurovascular protection by adropin in experimental ischemic stroke through an endothelial nitric oxide synthase-dependent mechanism
Source: PubMed Central journal article supplement — Redox Biol. 2021 Nov 22;48:102197. doi: 10.1016/j.redox.2021.102197 (PMC8633041; doi:10.1016/j.redox.2021.102197), 2021-11-22

# Full unedited gels for Figure 1A

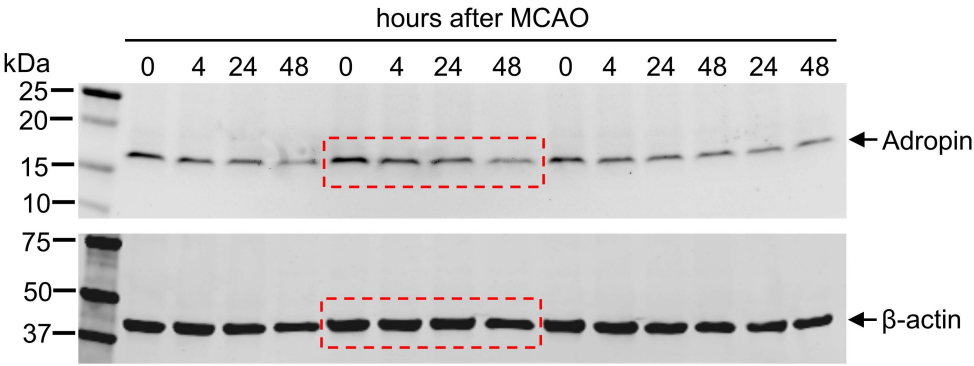

### Full unedited gels for Figure 4D

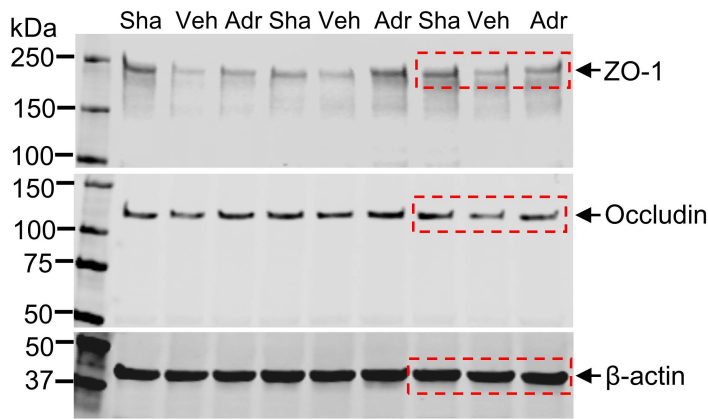

### Full unedited gels for Figure 4G

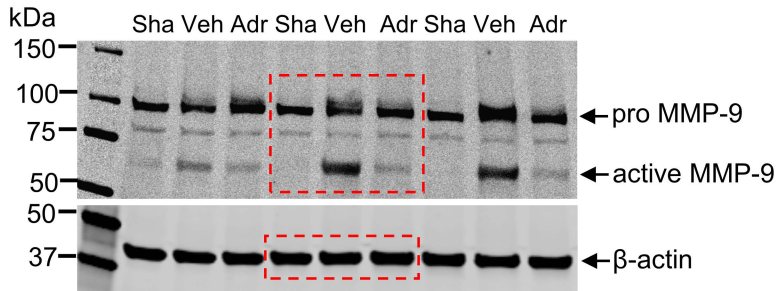

### Full unedited gels for Figure 4J

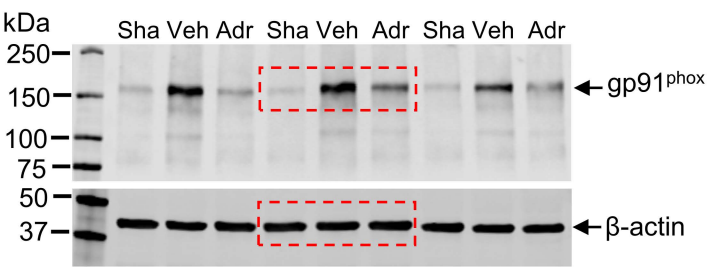

### Full unedited gels for Figure 4L

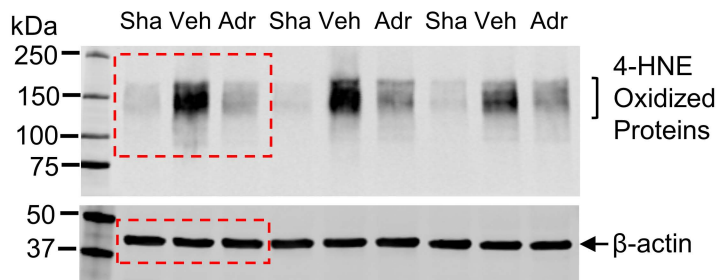

### Full unedited gels for Figure 4N

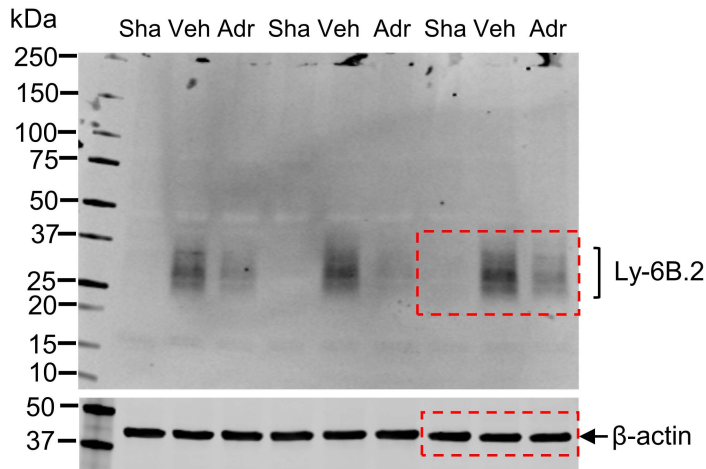

# Full unedited gels for Figure 5A

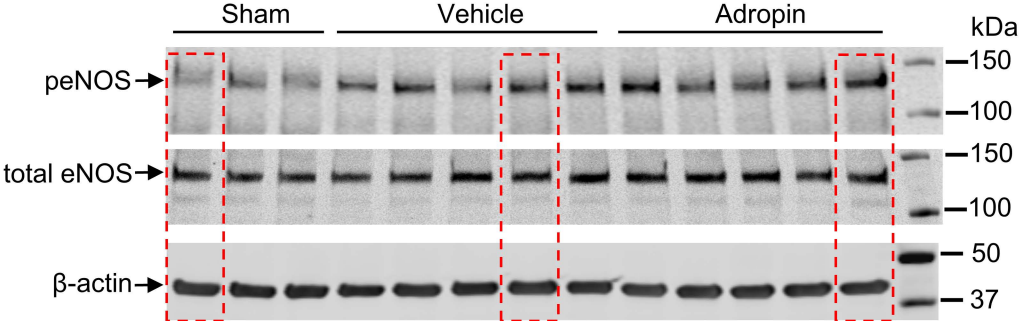

## Full unedited gels for Figure 6D

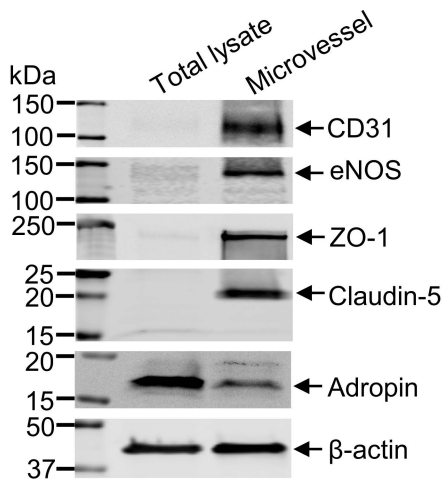

## Full unedited gels for Figure 6E

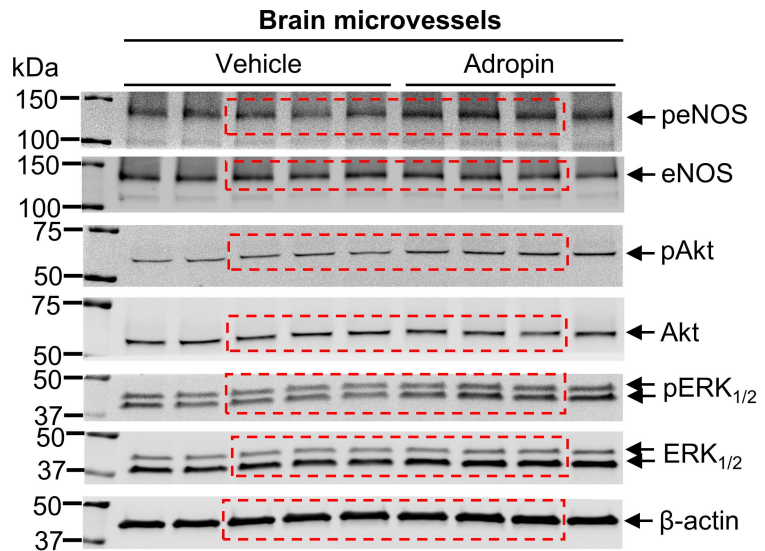

## Full unedited gels for Figure 6J

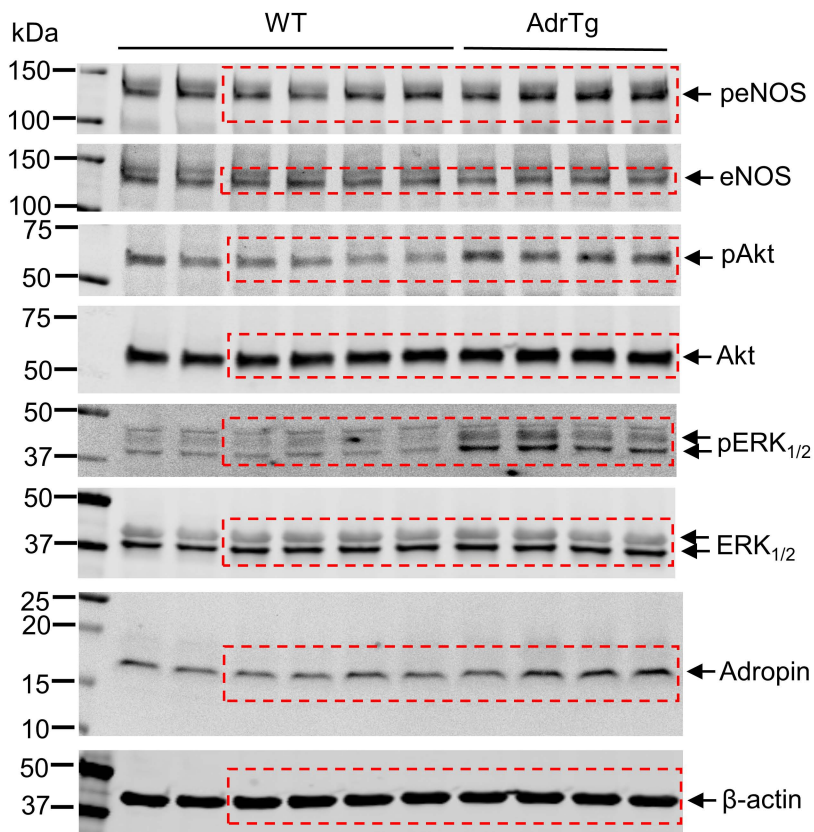

# Full unedited gels for Supplemental Figure 1C

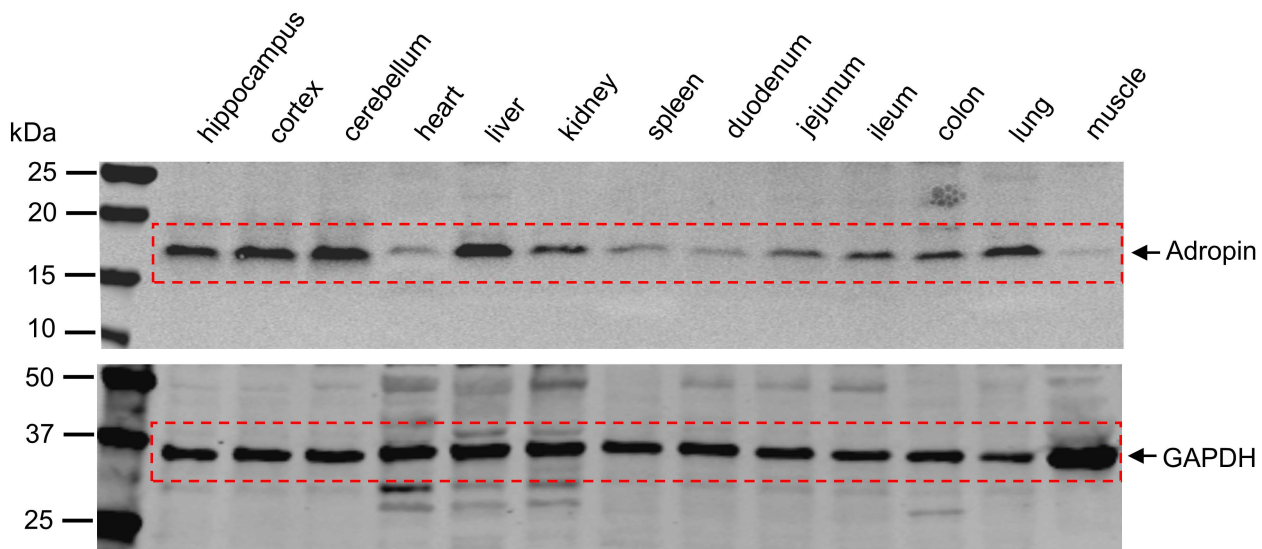

## Full unedited gel for Supplemental Figure 2D

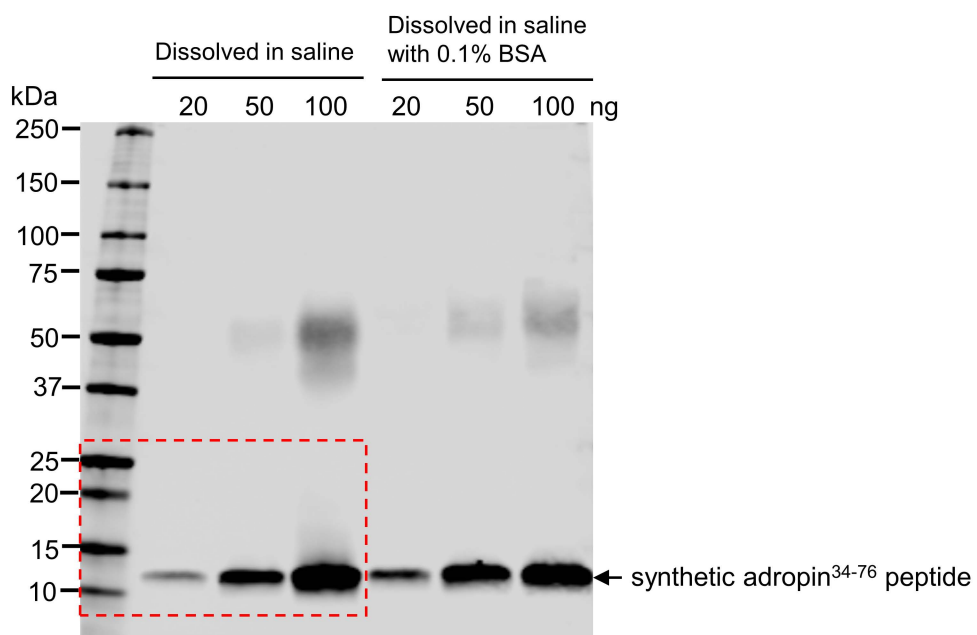



## Full unedited gels for Supplemental Figure 6A

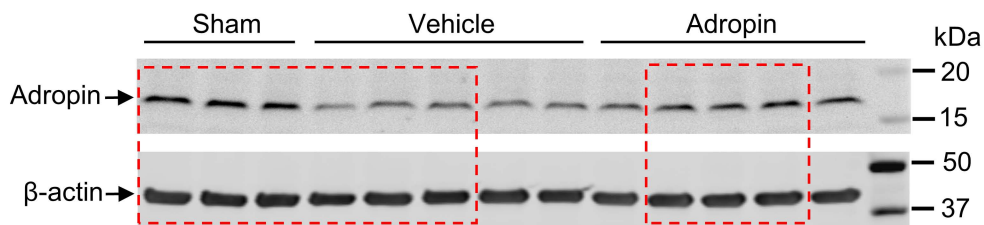

## Full unedited gel for Supplemental Figure 6C

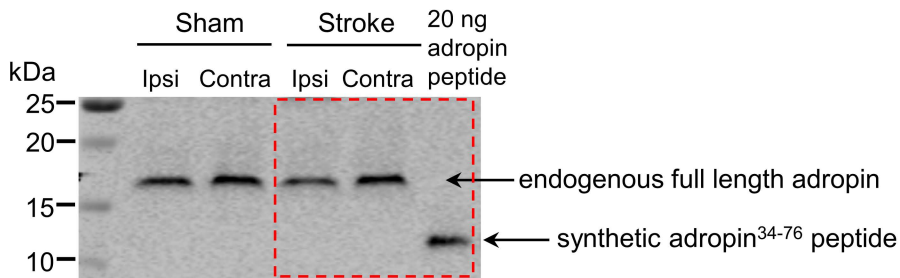

## Full unedited gel for Supplemental Figure 6D

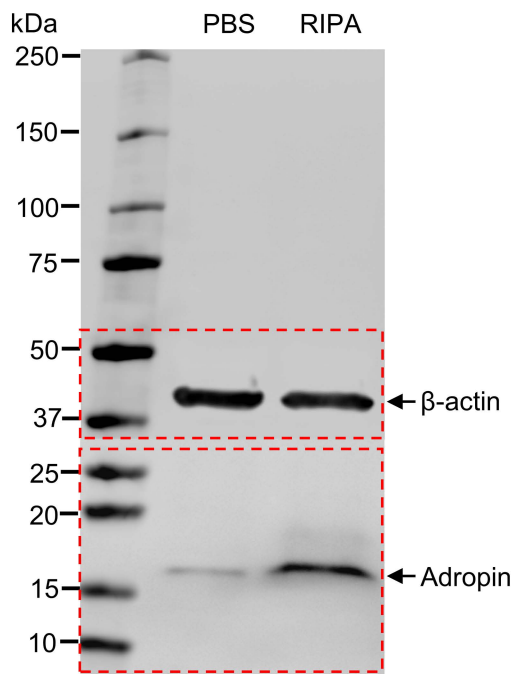

Supplement: mmc1.pdf [file mmc1.pdf]
